## Regional and hemispheric susceptibility of the temporal lobe to FTLT-DTP-43-C pathology

Borghesani, V.<sup>1</sup>, Battistella, G.<sup>1</sup>, Mandelli, M.L.<sup>1</sup>, Welch, A.<sup>1</sup>, Weis, E.<sup>1</sup>, Younes, K.<sup>1</sup>, Neuhaus, J.<sup>1</sup>,  
Grinberg, L.T.<sup>1</sup>, Seeley, W. M.<sup>1</sup>, Spina, S.<sup>1</sup>, Miller, B.<sup>1</sup>, Miller, Z.<sup>1</sup> & Gorno-Tempini, M.L.<sup>1,2</sup>

<sup>1</sup> *Memory and Aging Center, Department of Neurology, University of California San Francisco*

<sup>2</sup> *Department of Neurology, Dyslexia Center, University of California, San Francisco, CA*

### Corresponding author:

Valentina Borghesani, Ph.D.

Memory and Aging Center - University of California, San Francisco

675 Nelson Rising Lane, Suite 190 | San Francisco, CA 94158

[valentina.borghesani@ucsf.edu](mailto:valentina.borghesani@ucsf.edu)

**Abstract:** 410 words

**Introduction:** 1222 words

**Figures:** 5

**Tables:** 1

**Discussion:** 2360 words

### Highlights

- Anterior temporal lobe (ATL) degeneration is most often caused by FTLT-DTP-43 type C pathology
- Cases can present with predominantly left (60%) or right (40%) ATL atrophy
- Within ATLTs, medial regions are more vulnerable than lateral ones
- Longitudinally, atrophy spreads similarly in predominantly left and right cases
- Left and right temporal variants of FTD should be considered the same disease

## Abstract

Post-mortem studies show that focal anterior temporal lobe (ATL) neurodegeneration is most often caused by frontotemporal lobar degeneration TDP-43 type C pathology. Clinically, patients are inconsistently described with the terms semantic variant primary progressive aphasia (svPPA), semantic dementia (SD), or right temporal variant frontotemporal dementia (FTD) depending on whether the predominant symptoms affect language, semantic knowledge for object or people, or socio-emotional behaviors. The neuroimaging hallmark of these syndromes is ATL atrophy, with various degrees of lateralization. Cases presenting with initial right-sided atrophy are considered to be rarer than left-sided ones, yet estimation of their prevalence is hampered by the paucity of studies on well-characterized, pathology-proven cohorts. Moreover, it is not clear whether left and right variants show a similar distribution of atrophy within the ATL cross-sectionally and longitudinally.

Here we study the largest cohort to-date of pathology-proven TDP-43-C cases diagnosed during life as svPPA, SD or right temporal variant FTD. We analyzed clinical, cognitive, and neuroimaging data from 30 cases, a subset of which was followed longitudinally. Guided by recent structural and functional parcellation studies, we constructed four bilateral ATL regions of interest (ROIs). The computation of an atrophy lateralization index allowed the comparison of atrophy patterns between the two hemispheres. This led to an automatic, imaging-based classification of the cases as left-predominant or right-predominant. We then compared the two groups in terms of regional atrophy patterns within the ATL ROIs (cross-sectionally) and atrophy progression (longitudinally).

Results showed that 40% of pathology proven cases diagnosed with a temporal variant presented with right-lateralized atrophy. Moreover, the findings of our ATL ROI analysis indicated that, irrespective of atrophy lateralization, atrophy distribution within both ATLs follows a gradient from medial to lateral regions. Finally, in both left and right cases, atrophy appeared to progress to the contralateral ATL, and from the anterior temporal pole to posterior temporal and orbitofrontal regions.

Our results indicate that both left and right predominant ATL atrophy is common in TDP-43-C pathology. Moreover, the distribution of damage within the ATL, as well as its temporal extension, are the same regardless of where the atrophy started. As pharmacological interventions become available, the ability to predict the underlying pathology and to track longitudinal changes becomes crucial and, regardless of differences in clinical phenotype, left and right temporal variants of FTD caused by TDP-43-C should be viewed as the same disease. Establishing consistent clinical criteria for focal right temporal degeneration is thus necessary to improve diagnostic accuracy in PPA and FTD.

**Keywords:** semantic variant Primary Progressive Aphasia, semantic dementia, temporal variant, anterior temporal lobe, frontotemporal lobar degeneration, FTLD-TDP-43-C

## 1. Introduction

Frontotemporal dementia (FTD) is an umbrella term covering several clinical phenotypes associated with a progressive decline of executive functions, motor abilities, behavior, and/or language (Neary, Snowden, Gustafson, Passant, Stuss, Black, Freedman, Kertesz, Robert, Albert, Boone, et al., 1998). These clinical syndromes arise from neurodegeneration of cortical and subcortical structures within frontal and/or temporal lobes (frontotemporal lobar degeneration or FTLD) and are associated with diverse molecular pathologies (B. L. Miller et al., 1991). Converging lines of research associate the early-stages of neurodegenerative diseases to relatively focal atrophy affecting specifically susceptible cell assemblies, later spreading throughout large-scale networks (Brown et al., 2019; Raj, Kuceyeski, & Weiner, 2012; Seeley, Crawford, Zhou, Miller, & Greicius, 2009; Zeighami et al., 2015). Thus, careful clinicopathological investigations of well-defined groups of patients with focal neurodegeneration can deepen our understanding of regional vulnerability to proteinopathies (Soto & Pritzkow, 2018; Walsh & Selkoe, 2016), and have important implications for both clinical practice and cognitive neuroscience (Elahi & Miller, 2017).

Within the FTD family, in-vivo clinical studies have isolated a spectrum of syndromes characterized by selective anterior temporal lobe (ATL) atrophy, yet remarkable heterogeneity of linguistic and/or behavioral difficulties. While focal anterior temporal degeneration is reliably associated with abnormal depositions of the transactive response DNA-binding protein Mr43kD43 (TDP-43) type C (Rohrer, Gennatas, & Trojanowski, 2010; Spinelli et al., 2017), patients have been inconsistently diagnosed with semantic dementia (SD (Julie Snowden, Goulding, & Neary, 1989)), semantic variant PPA (svPPA (Gorno-tempini et al., 2011)), right temporal variant FTD (Thompson, Patterson, & Hodges, 2003) or behavioral variant FTD (bvFTD (Rascovsky et al., 2011)). Predominant clinical symptoms in these patients include linguistic (e.g., anomia and word comprehension deficits), semantic (e.g., inability to recognize objects and famous faces), behavioral (e.g., disinhibition) or emotional (e.g., facial expression recognition deficit) difficulties. While most patients present with bilateral atrophy and overlapping language and behavioral symptoms, two main clinical profiles have been described in relation to atrophy lateralization. Cases with predominantly left atrophy have been associated with greater naming, word comprehension, reading and object semantic deficits (Lambon Ralph, McClelland, Patterson, Galton, & Hodges, 2001; M. Marsel Mesulam et al., 2013). These patients almost invariably meet current consensus criteria for svPPA (Gorno-tempini et al., 2011). On the other hand, the clinical phenotype of right ATL atrophy is less well defined and has been associated with various degrees of socio-emotional, semantic (person-specific knowledge) and face recognition impairments (Binney et al., 2016; Chan et al., 2009; Edwards-Lee et al., 1997; Julie Snowden et al., 2017; Woollams & Patterson, 2017). These patients do not clearly meet criteria for svPPA (McCarthy & Warrington, 2016), as their nonverbal semantic loss can only be captured with specialized neuropsychological tests (e.g., identification of famous faces). Overall, relatively fewer cases have been described (Hodges et al., 2010), but attempts to estimate the incidence of predominantly left vs. right ATL involvement in FTLD-TDP-43-C have been hampered by the paucity of studies on pathology-proven datasets. Furthermore, misclassifications are likely when diagnoses are based on clinical criteria that have not been

tailored to include nonverbal semantic deficits. It is currently hard to distinguish, from history and neuropsychological testing, the so-called right temporal variant of svPPA/SD and bvFTD, as they might both present with emotional and behavioral changes. Early, reliable differential diagnosis between svPPA and bvFTD is critical because the latter is not associated with a predominance of TDP-43-C pathology but rather with a variety of FTLD subtypes (D. C. Perry et al., 2017). To date, our understanding of the right temporal variants has relied on data stemming from single cases (e.g., (Barbarotto R, Capitani E, Spinnler H, 1995; Gainotti, Barbier, & Marra, 2003; ML Gorno-Tempini et al., 2004; Henry, 2014; Joubert et al., 2004; M. F. Mendez & Ghajarnia, 2001)), or small samples without pathological diagnosis (e.g., (Binney et al., 2016; Brambati et al., 2009; Chen et al., 2018; Hodges et al., 2010; Kumfor et al., 2016; Mion et al., 2010; J. S. Snowden, Thompson, & Neary, 2012; Julie Snowden et al., 2017; Thompson et al., 2003; Woollams & Patterson, 2017)). Here, we describe and compare the clinical and anatomical features of a large group of left and right predominant patients with TDP-43-C pathology. This will contribute towards more tailored criteria that specifically addresses the hallmark deficits caused by atrophy in the left or right ATL, as well as improve our understanding of the cognitive functions subserved by these lobes.

Variability in the clinical presentation of focal ATL neurodegeneration is likely linked to the extent and lateralization of atrophy within and between the temporal lobe, a structurally and functionally extremely heterogeneous portion of cortex. Cellular, neurochemical, and pathological markers suggests the existence of at least seven distinct regions within the ATL (Ding, Van Hoesen, Cassell, & Poremba, 2009). Convergent evidence comes from in-vivo studies of structural and functional connectivity profiles. Based on whole brain functional connectivity patterns, Pascual and colleagues identified four major functional sub-regions within the ATL preferentially connected with the default-semantic network, paralimbic structures, visual networks, or auditory/somatosensory and language networks (Pascual et al., 2015). Similarly, structural connectivity analyses using diffusion tensor imaging support a structural parcellation within the ATL. For instance, Papinutto and colleagues demonstrated differential connectivity from a rostral region of the ATL to the orbitofrontal cortex (OFC), an anterior-lateral region to the occipital pole (OP), a ventro-lateral region to the middle temporal gyrus (MTG), a dorsal region to the superior temporal gyrus (STG), and two ventro-medial regions to the inferior temporal gyrus (ITG) and the fusiform gyrus (Fus) (Papinutto et al., 2016). Neuroimaging and neuropsychological investigations of the mosaic of functions subserved by the ATL has been hampered by the fact that it is highly susceptible to artefacts in fMRI (Visser, Jefferies, & Lambon Ralph, 2010) and rarely touched by strokes (but see (Tsapkini, Frangakis, & Hillis, 2011)). Instrumental to this end have been findings from neurodegenerative disease (Julie Snowden et al., 1989), herpes simplex encephalitis (Kapur et al., 1994), temporal lobe epilepsy (Chabardès et al., 2005), and traumatic brain injury (Bigler, 2007). Overall, the ATL has been associated with language, in particular semantic knowledge (Binney, Embleton, Jefferies, Parker, & Lambon Ralph, 2010), but also socio-emotional cognition (Olson, Plotzker, & Ezzyat, 2007) and higher order visual, auditory and olfactory processes (Murray & Richmond, 2001). Notwithstanding this clear evidence of structural and functional subregions within the ATL, we currently lack an adequate description of regional atrophy distribution in TDP-43-C driven temporal variants of FTD. Moreover, while the longitudinal

evolution of svPPA cases has been described (Brambati et al., 2009; Kumfor et al., 2016; Rohrer et al., 2008), atrophy progression of path-proven cases with asymmetric ATL involvement has never been compared.

In this study we investigate distribution and progression of TDP-43-C driven ATL neurodegeneration analyzing behavioral, imaging and clinical data in a sample of 30 pathology-proven cases of TDP-43-C having received a diagnosis of one of the temporal variants of FTD. First, we assessed the percentage of cases presenting with predominantly left vs. right atrophy applying an anatomical mask of the ATL. We then developed a novel parcellation of the ATL to investigate local atrophy distribution within each hemisphere. Finally, we described the progression of atrophy within and outside the temporal lobe. We hypothesized that right-sided ATL degeneration is more common than previously thought and that atrophy distribution and progression would be similar, yet mirrored, in the two hemispheric variants.

## **2. Materials and methods**

### **2.1 Participants**

In this retrospective study, we included all patients in the database of the Memory and Aging Center at University of California, San Francisco (UCSF) that met the following inclusion criteria: (1) postmortem neuropathological diagnosis of TDP-43-C, (2) clinical diagnosis of semantic variant of PPA (svPPA (Gorno-tempini et al., 2011)), semantic dementia (SD (Neary, Snowden, Gustafson, Passant, Stuss, Black, Freedman, Kertesz, Robert, Albert, Boone, et al., 1998)), right variant of SD, temporal variant of FTD, or right variant of FTD. Seven cases met criteria for one of these clinical syndromes but were excluded because they did not present with TDP-43-C pathology: three had Pick's disease, two globular glial tauopathy, and two TDP-43 type B with concomitant motor neuron disease and unclassifiable FTLT-tau pathology respectively. Two cases showed TDP-43-C pathology at autopsy but did not meet clinical criteria for any FTD clinical syndrome, rather for mild cognitive impairment (MCI). Thirty-seven patients, all recruited between October 1, 1998 and January 31, 2014, met our inclusion criteria. Twenty-five of these patients have already been included in a previous publication (Spinelli et al., 2017). Only five patients had a secondary contributing pathology: progressive supranuclear palsy (PSP) in two cases, primary lateral sclerosis (PLS) in other two, and finally Alzheimer disease (AD) in one. Structural imaging was available for 30 of the 38 included patients. For 17 patients, three scans at least six months apart were available, allowing for additional longitudinal analyses in this subset. Table 1 and Results section 3.4 describe the demographic and neuropsychological profiles of our cohort. The study was approved by the UCSF Committee on Human Research and all subjects provided written informed consent.

### **2.2 Neuropathological, genetic, and neuropsychological assessment**

Thirty-one autopsies were performed at UCSF, and six were performed at the University of Pennsylvania. Primary and secondary pathological changes were established by the pathologist based on consensus criteria (Kovacs et al., 2016; I. Mackenzie et al., 2011; McKeith et al., 1996; Montine et al., 2012).

For 30 out of the 37 participants who donated their brains, blood samples were available. Following previously described protocols (Li et al., 2014; Moreno et al., 2015), we screened for known pathogenic mutations in the following genes: GRN, MAPT, TARDBP, C9ORF72, APP, PSEN1, PSEN2, FUS. Apolipoprotein E (APOE) and MAPT H1/H2 haplotypes were also assessed.

Clinical diagnosis was based on published criteria by a team of clinicians based on a detailed medical history, comprehensive neurological exam, and standardized neuropsychological and language evaluations (Gorno-tempini et al., 2011; Kramer et al., 2003). Demographic and neuropsychological characteristics of the patients included in the study are shown in Table 1. Two-sample t-tests (two-tailed distributions, significance threshold set at  $p < 0.05$ ) were used to statistically assess group differences between healthy controls published data (M Gorno-Tempini et al., 2004; Watson et al., 2018) and our TDP-43-C patients, considered as an undifferentiated cohort as well as split in two groups following the neuroimaging results described later (i.e., left-predominant vs. right-predominant atrophy pattern). Similarly, we directly compared left-predominant and right-predominant groups to investigate atrophy lateralization effects on the neuropsychological profile.

### 2.3 Neuroimaging protocols

For the neuroimaging analysis, an additional set of thirty healthy controls (HC, 18 females, mean age  $65.1 \pm 8.7$ ) matched with patients for age, gender, and scanner type was included from the MAC UCSF Hillbloom healthy aging cohort. 3D T1-weighted images with a magnetization-prepared rapid gradient echo sequence (MPRAGE) were obtained from patients and HC using either a 1.5, 3, or 4 Tesla scanners with the following parameters. For 1.5T images: Siemens Magnetom VISION system (Siemens, Iselin, NJ), standard quadrature head coil, 8-channel, 164 coronal slices; repetition time (TR) = 10 ms; echo time (TE) = 4 ms; inversion time (TI) = 300 ms; flip angle =  $15^\circ$ ; field of view (FOV) =  $256 \times 256 \text{ mm}^2$ ; matrix  $256 \times 256$ ; in plane voxel size  $1.0 \times 1.0 \text{ mm}^2$ ; slice thickness = 1.5 mm. For 3T images: Trio Siemens, 8-channel receive head coil, 160 sagittal slices, TR=2300ms, TE = 2.98 ms, TI = 900 ms, flip angle  $90^\circ$ , FOV =  $256 \text{ mm}^3$ , matrix size =  $256 \times 240$ , in plane voxel size  $1.0 \times 1.0 \text{ mm}^2$ ; slice thickness = 1 mm. For 4T images: Bruker/Siemens, single housing birdcage transmit and 8-channel receive coil, 157 sagittal slices; TR = 2300 ms; TE = 3 ms; TI = 950 ms; flip angle =  $7^\circ$ ; FOV =  $256 \text{ mm}^2$ ; matrix  $256 \times 256$ ; in plane voxel size  $1.0 \times 1.0 \text{ mm}^2$ ; slice thickness = 1 mm.

### 2.4 ATL parcellation

We investigated regional ATL susceptibility to TDP-43-C driven neurodegeneration with a trade-off between anatomical and cytoarchitectonic specificity. Given the spatial resolution of our T1 images, and the spread of atrophy observed even in the earliest cases, the fine-grained partition provided by cytoarchitectonic and chemoarchitectonic

markers could not be used directly (Ding et al., 2009). Rather, we parcellated both ATLs into four regions of interest based on previous findings of dissociable functional and structural connectivity profiles which suggested four-to-six main subdivisions (Papinutto et al., 2016; Pascual et al., 2015). In particular, the structural partition suggested by Papinutto and colleagues, based on white matter connectivity of the ATL to cortical areas, was refined following the cytoarchitectonic characteristics described by (Ding et al., 2009). We obtained four ATL ROIs in each hemisphere, covering anterior and posterior portions of the medial and lateral ATL, and corresponding to paralimbic and neocortical structures, respectively. The ROIs were defined, in the MNI space, as (see Figure 3A):

- an inferior-medial region, in (Papinutto et al., 2016) preferentially connected with inferior occipital pole and inferior temporal gyrus, encompassing areas 35 and 36 as described in (Ding et al., 2009), obtained by dividing the original parcellation with a plane at  $x=42$ ;
- a superior-medial region, in (Papinutto et al., 2016) preferentially connected with orbitofrontal cortex, and including areas TG and TE (Ding et al., 2009);
- an inferior-lateral region, in (Papinutto et al., 2016) preferentially connected with middle temporal gyrus, and including areas EC and TI (Ding et al., 2009);
- a superior-lateral region, in (Papinutto et al., 2016) preferentially connected with superior occipital pole and superior temporal gyrus, and encompassing area TA (Ding et al., 2009), obtained by dividing the original parcellation with a plane at  $x=42$ .

Finally, the sum of the four ipsilateral ROIs lead to the development of two masks for left vs. right ATLs, used to compute an index of atrophy lateralization (see below).

## 2.5 MRI cross-sectional analyses

Cross-sectional voxel-based morphometry (VBM) analysis of the structural images was conducted to assess volume differences across cohorts, as later described. Image processing was performed using Statistical Parametric Mapping (SPM12) (Wellcome Trust Center for Neuroimaging, London, UK; <http://www.fil.ion.ucl.ac.uk/spm/software/spm12/>) running on Matlab R2013a (MathWorks). All the structural images were first resampled at the same voxel size ( $1.5 \times 1.5 \times 1.5 \text{ mm}^3$ ), then segmented into gray matter (GM), white matter (WM) and cerebrospinal fluid (CSF). Segmented images then were registered to a custom template and modulated by the Jacobian determinant to preserve the relative GM volume. Finally, images were smoothed for statistical analysis (8 mm full-width at half-maximum [FWHM] Gaussian kernel). Whole-brain differences in GM volume were investigated using a general linear model including age, gender, handedness, total intracranial volume (TIV), total GM volume, and scanner type as covariates.

To assess whole-brain differences in GM volume, three group comparisons were performed: HC vs. all TDP-43-C cases, HC vs. predominantly left TDP-43-C cases, HC vs. predominantly right TDP-43-C cases. Whole-brain

between-group statistically significant differences in GM volume were explored at  $p < 0.05$  corrected for family-wise error (FWE), with a cluster extended threshold of 100 voxels.

Besides these standard voxel-wise whole-brain VBM analyses, we further characterized the pattern of atrophy between and within temporal lobes by using our ad-hoc parcellation, grounded in functional, structural and histological evidence of ATL heterogeneity. First, for each subject, we computed the average GM value in each ROI. This value was scaled by the TIV to control for head size differences, and normalized dividing it by the average volume in HC to express distance from normal values. We then calculated a laterality index as the ratio between the difference in volume between the two hemispheres and their sum, i.e.:  $(Av\_Right - Av\_Left) / (Av\_Right + Av\_Left)$ , where (as described above) the masks used to compute  $Av\_Right$  and  $Av\_Left$  were given by the sum of the four ROIs on the right and left hemisphere respectively. A positive index thus indicates predominantly left atrophy, while a negative one denotes greater atrophy in the right ATL. This index allowed for a data-driven classification of all TDP-43-C cases as either predominantly-left or predominantly-right (fixing the threshold for classification at 0). It should be noted that this measure of atrophy asymmetry is relative to the single subject, i.e., established for each individual case, not resulting from a comparison to the group. The label assigned identifies the hemisphere most affected intra-individually; it does not preclude the possibility that the non-predominantly affected hemisphere might also be severely affected, when compared to controls or other patients.

We then visualized and statistically compared volume loss across subjects, ROIs, and hemispheres, aiming to assess possible modulations of the within-ATL atrophy distribution. Normalized atrophy scores were entered in a linear mixed effect model with fixed effects for atrophy lateralization (i.e., predominantly left vs. right), hemisphere (i.e., left vs. right ATL) and ROIs (i.e., 4 regions from medial to lateral), and a random by-participant intercept, allowing for interactions between all main effects (i.e., atrophy lateralization, hemisphere and ROIs). As we observed a lack of significant two- and three- way interactions between ROI and atrophy lateralization/hemisphere, we fit a second, restricted, model that considered only the main effects and the interaction between atrophy lateralization and hemisphere. It should be noted that this latter interaction is trivial and expected since patients' atrophy lateralization was established based on the hemisphere being most affected. We then statistically compared the results of two models via a likelihood ratio test. A similar performance between the full and restricted models would corroborate our results and strongly suggest that the variance in the data is explained by the main effects (i.e., atrophy lateralization, hemisphere, and ROIs) and by the expected interaction between atrophy lateralization and hemisphere, with no modulation of the ROIs effect by neither atrophy lateralization nor hemisphere.

Finally, we correlated the average volume loss in our eight ROIs with two tests that measure key neuropsychological features of left and right temporal variants of FTD respectively (Binney et al., 2016): PALPA – exception word reading (a measure of surface dyslexia caused by verbal semantic deficits) and the Neuropsychiatric Inventory (a measure of behavioral symptoms).

## 2.6 MRI longitudinal analyses



Whole brain maps of longitudinal volume changes were estimated using the Pairwise Longitudinal Registration Toolbox as implemented in SPM12 (version 5298, (Ashburner and Ridgway, 2012)). Processing steps included: (1) intra-subject registration and generation of a within-subject template; (2) computation, for each subject, of two Jacobian determinant maps describing the relative difference in volume between two scans and the average template; (3) computation of the difference between the two Jacobian determinants providing a map of relative longitudinal change; (4), division of the map by the inter-scan interval to express the annual rate of relative volume change. Finally, for statistical purposes, images were warped using the above-mentioned deformation composition to the MNI space and smoothed with a Gaussian kernel (4 mm FWHM). Whole-brain differences of gray matter changes were investigated using a general linear model including age, gender, handedness, and scanner type as covariates. Two group comparisons were performed: HCs vs. predominantly left TDP-43-C cases, HCs vs. predominantly right TDP-43-C cases. We repeated the process twice to compute change maps between time point 1 and time point 2, as well as between time point 2 and time point 3. Results are shown with a threshold of significance set at  $p < 0.05$  corrected for family-wise error (FWE), with a cluster extended threshold of 100 voxels. Subsequently, a more liberal threshold at  $p < 0.001$ , uncorrected, was explored to avoid false negatives that can occur in small groups' sample size.

### **3. Results**

#### 3.1 Atrophy distribution between the ATLS: imaging-based classification of left vs. right variants

We sought to characterize the pattern of atrophy distribution between the two ATLS in a data-driven, imaging-based way. The undifferentiated cohort of TDP-43-C cases presented with the expected pattern of atrophy, involving bilateral ATLS, but with greater volume loss in the left hemisphere (Figure 1). Consistent with previous studies in svPPA (Chan et al., 2001; Galton et al., 2001; Mummery et al., 2000; Nestor, Fryer, & Hodges, 2006), the most severely affected regions of the left temporal lobe included the temporal pole (BA 38), the fusiform (BA 20) and lingual (BA 37) gyri. In the right hemisphere, significant volume loss was found in the temporal pole (BA 38) and inferior (BA 20) temporal gyri. In both hemisphere amygdala, hippocampus and parahippocampal regions were severely affected, with an anterior-to-posterior gradient (Binney et al., 2016; Chan et al., 2001).

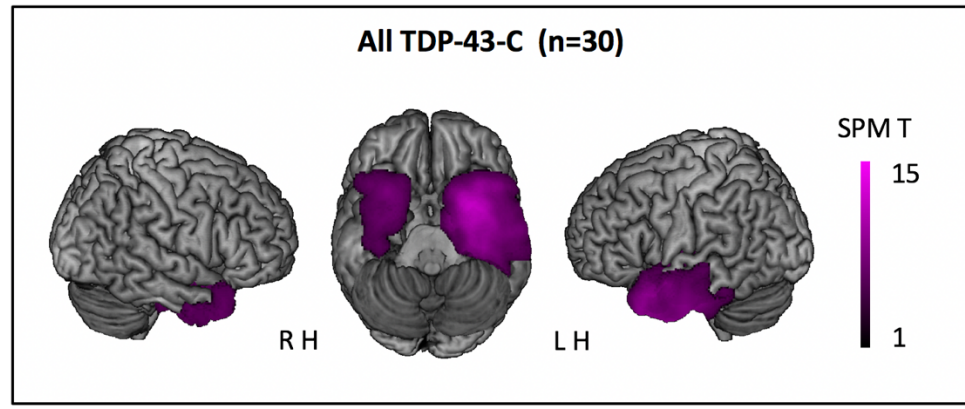

**Figure 1. Atrophy distribution in 30 path-proven TDP-43-C cases.** Render illustrating the results of the voxel-based morphometry (VBM) analysis identifying regions of grey matter volume loss in our sample of TDP-43-C patients (n=30) relative to age-matched healthy controls. Statistical maps are thresholded at  $p < 0.05$  family-wise error (FWE) corrected, cluster extend 100 voxels. Covariates: age, gender, handedness, TIV, GM, and scanner type.

We then investigated subject-specific atrophy asymmetry in a data-driven fashion. Relying on anatomical masks of the two ATLs (Figure 2A), we computed an index of atrophy lateralization (see Methods) and automatically classified each patient as left-predominant or right-predominant. Eighteen cases were found to have left-lateralized atrophy (60%, Figure 2B), with lateralization values ranging from a maximum value of 0.21 to a minimum of 0.01 (mean: 0.15, std: 0.5). In twelve cases, a right-lateralized atrophy pattern was detected (40%, Figure 2B), with lateralization values ranging from a maximum value of -0.24 to a minimum of -0.06 (mean: -0.13, std: 0.05).

To assess potential differences outside the temporal lobes, whole-brain VBM results for the two groups are showed in Figure 2C. Left-predominant cases show significant gray matter volume loss in left temporal pole (BA 38), left fusiform (BA 20) and left lingual (BA 37) gyri, as well as in the right temporal pole. In right-predominant cases, we observed significant atrophy not only in the right temporal pole, right fusiform and right lingual gyri, but also in the left temporal pole and left inferior frontal gyrus. These results are in line with previous studies comparing left and right temporal variant of FTD (Binney et al., 2016; Brambati et al., 2009; Kumfor et al., 2016; Rogalski et al., 2014).

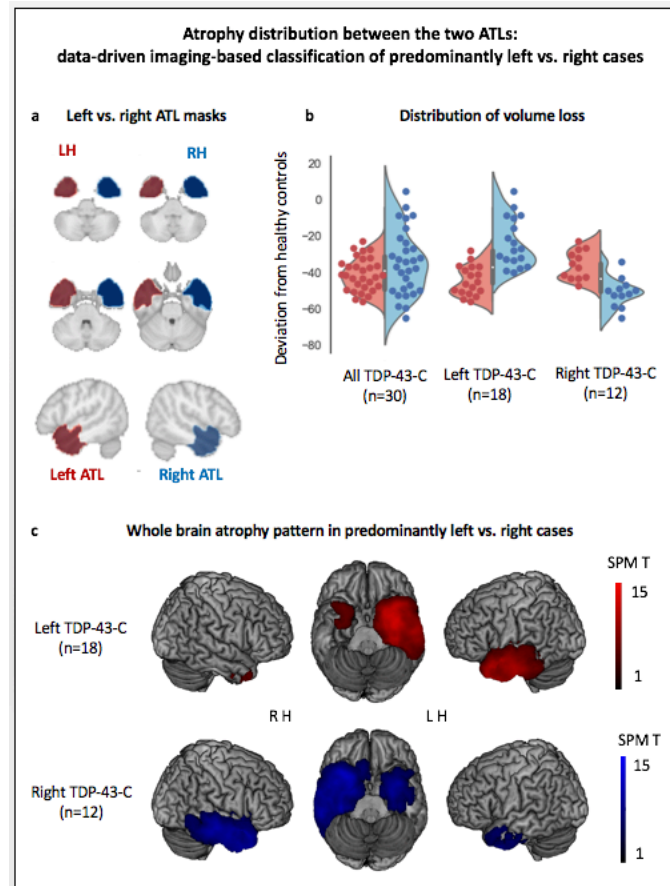

**Figure 2. Atrophy distribution between the ATLs: automatic classification in left-predominant vs. right-predominant cases.** A) Mask of the anterior temporal lobe (ATL) used to assess atrophy lateralization index. B) Violin plot illustrating subjects mean percentage of volume loss in the left (red) and right (blue) ATL for the undifferentiated cohort of TDP-43-C cases (n=30), for cases with a positive atrophy lateralization index (i.e., atrophy predominantly affecting the left ATL (n=18), and for cases with a negative atrophy lateralization index (i.e., right-predominant ATL atrophy (n=12). C) Voxel-based morphometry (VBM) for left-predominant (n=18, red) and right-predominant (n=12, blue) cases. Maps are thresholded at  $p < 0.05$  family-wise error (FWE) corrected, cluster extend 100 voxels. Covariates: age, gender, handedness, TIV, GM, and scanner type.

### 3.2 Atrophy distribution within ATLs: hemispheric invariant medial-to-lateral gradient

Given the known anatomical heterogeneity of the temporal pole, we aimed to describe and compare atrophy distribution within the two ATLs. We examined regional differences thanks to a novel parcellation of the ATL based on recent findings on its structural connectivity profile (Figure 3A). In both hemispheres, and irrespective of atrophy lateralization, medial regions of the ATLs appeared to be more affected by volume loss than lateral ones (Figure 3B). A linear mixed effect model revealed a significant effect of atrophy lateralization (left-predominant vs. right-predominant,  $z = 2.11$ ,  $p < 0.034$ ) and hemisphere (left vs. right,  $z = 10.32$ ,  $p < 0.0001$ ). Moreover, all four ROIs were significantly different in volume (all  $p < .05$ ), except the two most medial ROIs, which were only marginally

significantly different ( $p = 0.06$ ). Unsurprisingly, given how atrophy lateralization was computed, there was a significant two-way interaction between atrophy lateralization and hemisphere ( $z = -11.3$ ,  $p < 0.0001$ ). Crucially, none of the other two- and three- way interactions were significant, indicating that atrophy lateralization did not modulate across-ROIs atrophy distribution, nor did hemisphere, or their combination. This null finding suggests that the within-ATL pattern of atrophy is not modulated by either atrophy lateralization or hemisphere. To corroborate this observation, we ran a second, restricted, model that did not include interaction terms for the two- and three- way interactions involving ROIs. This model confirmed our previous results, indicating a main effect of atrophy lateralization (left-predominant vs. right-predominant,  $z = 2.5$ ,  $p < 0.012$ ), hemisphere (left vs. right,  $z = 20.93$ ,  $p < 0.0001$ ), and ROIs (all  $p$ s  $< .05$ ), and a significant two-way interaction between atrophy lateralization and hemisphere ( $z = -23.04$ ,  $p < 0.0001$ ). Critically, the full and restricted models did not statistically differ from each other ( $\text{Chisq} = 4.74$ ,  $p = .86$ ), supporting the idea that the variance in the data is explained by the main effects (i.e., atrophy lateralization, hemisphere, and ROIs) and by the expected interaction between atrophy lateralization and hemisphere, with no modulation of the ROI effect by atrophy lateralization or hemisphere.

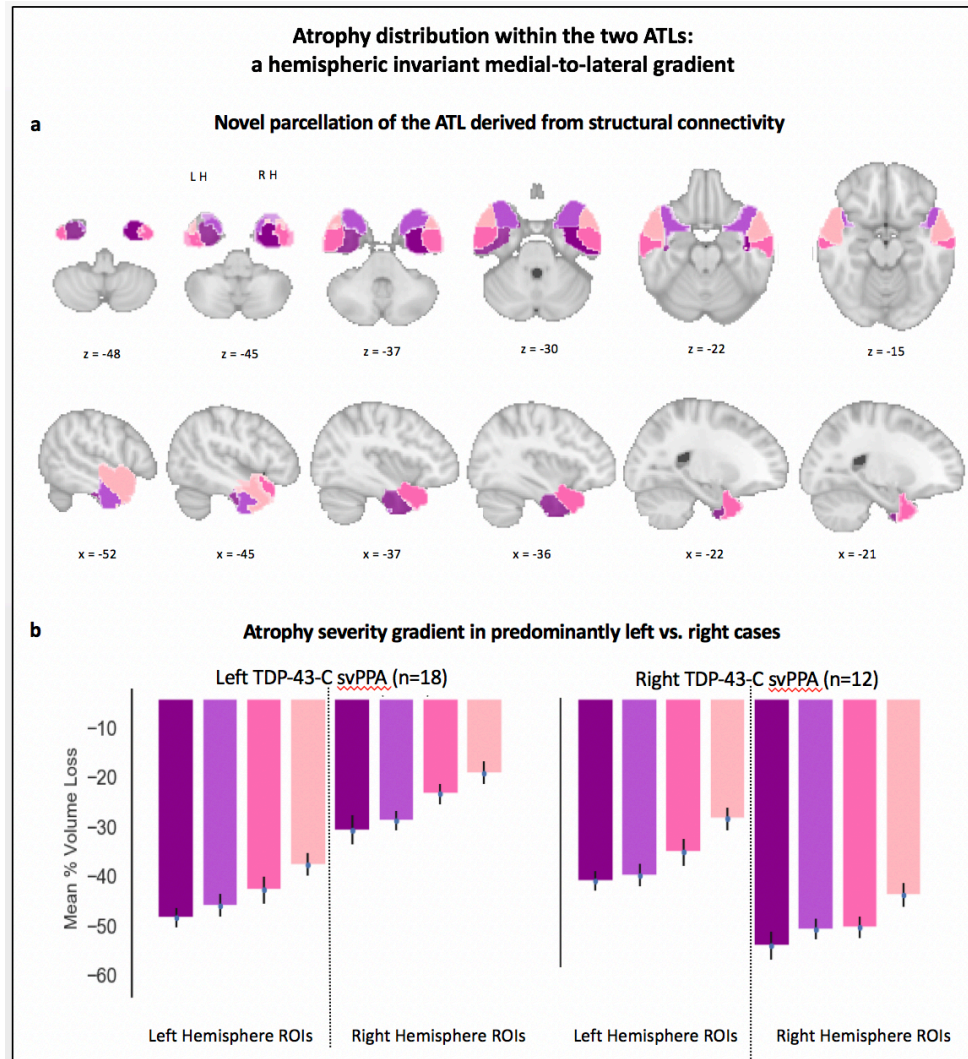

**Figure 3. Atrophy distribution within ATLs: hemispheric invariant medial-to-lateral gradient.** A) Regions of interest (ROIs) drawn to parcellate the anterior temporal lobe in regions with known differences in cytoarchitecture, as well as structural and functional connectivity. B) Mean percentage of volume loss in the 4 bilateral ROIs for left-predominant (left, n=18) and right-predominant (right, n=12) TDP-43-C svPPA. Error bars represent standard error of the mean (SEM).

### 3.3 Atrophy longitudinal progression: a mirror evolution

After establishing the pattern of atrophy distribution between and within the two ATLs, we compared longitudinal changes in left- and right-predominant TDP-43-C cases. Between time point 1 and time point 2, left-predominant patients lost volume in right anterior temporal and left posterior temporal lobes (Figure 4A, in red). Similarly, right-predominant cases showed increased atrophy in left anterior temporal and right posterior temporal lobes (Figure 4A, in blue). Comparing time point 2 with time point 3, both variants show mirrored spreading of atrophy to more posterior regions of both temporal lobes, as well as more involvement of the ipsilateral orbitofrontal cortex (Figure 4B). These results, in line with previous findings (Brambati et al., 2009; Kumfor et al., 2016), indicate

a progressive merging of the two variants to a common profile of bilateral temporal atrophy. It should be noted that the right-predominant cases included in these analyses are only four and that when the whole longitudinal sample is considered (n=17), the pattern of change was driven by left-predominant cases progressing contralaterally to atrophy on the right, as previously reported (Rohrer et al., 2008).

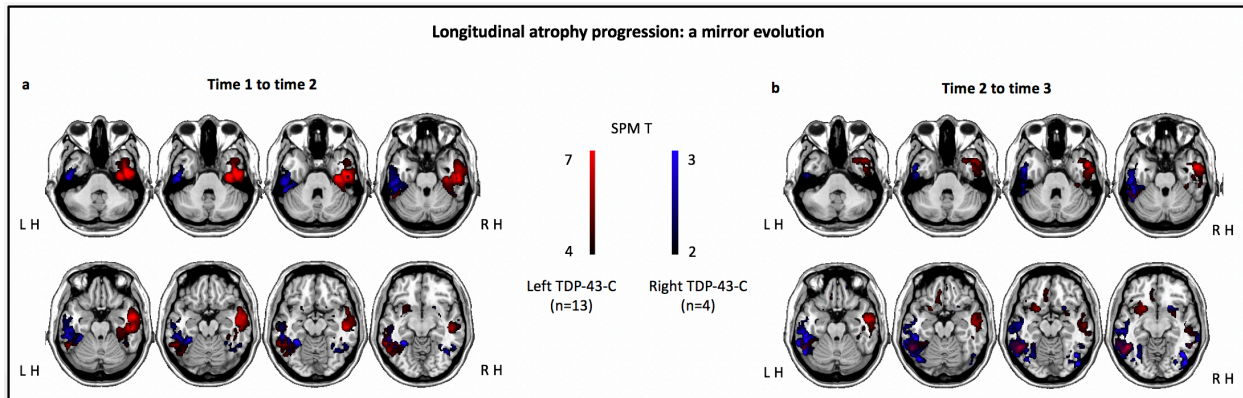

**Figure 4. Longitudinal atrophy progression.** Overlay of the change maps for left-predominant (in red, n=13) and right-predominant (in blue, n=4) TDP-43-C cases between time 1 and time 2 (A) and between time 2 and time 3 (B). Given the small sample size, maps are thresholded at  $p < 0.001$  uncorrected. Covariates: age, gender, handedness, and scanner type.

### 3.4 Lateralization of ATL neurodegeneration drives two clinical phenotypes

To better characterize TDP-43-C driven ATL neurodegeneration, we first describe the demographic, genetic and neuropsychological profile of all patients for which behavioral data is available. We then focus on those included in the cross-sectional imaging portion of the study, which allows us to illustrate the phenotypical differences between left- and right-predominant TDP-43-C cases. It should be noted that given the retrospective and path-confirmed nature of the study, not all measures are available for all subjects. Table 1 reports all data, as well as the number of subjects for which a given score is available.

As per selection criteria, all 38 patients included in the study (16 females, four left-handed, mean (SD) age = 64.68 ( $\pm$  7.48) years, mean (SD) education = 16.11 ( $\pm$  3.11) years) had received a diagnosis falling within the umbrella of temporal variants of FTD. At the time of their first evaluations (between 1998 and 2012), all patients met Neary criteria (Neary, Snowden, Gustafson, Passant, Stuss, Black, Freedman, Kertesz, Robert, Albert, & Boone, 1998). Specifically, they all meet criteria for semantic variant of FTD (SD in Neary et al., 1998), except for two who met criteria for behavioral variant (FTD in Neary et al., 1998) and eight who could be diagnosed with either SD or FTD. All ten of these patients were classified by our atrophy lateralization index as right-predominant TDP-43-C.

Only two patients with PGRN missense mutation were detected in the pool of 30 for which genetic data was available; both cases were included in the cross-sectional portion of the present imaging study. Our automatic classification assigned one of them to the left-predominant atrophy group and the other to the right-predominant

one. The ApoE4 allele was present in three patients (one left-predominant, two right-predominant). The H1/H1 MAPT haplotype was found in 56% of the cases, with no significant differences between predominantly left vs. right cases (left-predominant = 7:7, right-predominant = 9:4,  $\chi^2=1.03$ ,  $p=0.31$ ).

The neuropsychological characteristics of the undifferentiated cohort of TDP-43-C cases are consistent with the expected profile for temporal FTD and summarized in Table 1. Significant differences from healthy controls indicate semantic deficits and impaired comprehension with no sign of apraxia of speech or dysarthria. In line with previous evidence, the same overall pattern is observed when left-predominant and right-predominant cases are considered separately, yet interesting distinctions can also be appreciated (Binney et al., 2016; Lambon Ralph et al., 2001; M. Mendez, Kremen, Tsai, & Shapira, 2010; Mion et al., 2010). The two groups appear to be well matched in terms of education, age at testing, and age at onset. Global cognitive performance was comparable, with no significant difference in MMSE and CDR. Left-predominant patients presented with greater impairment in object naming (short BNT,  $t=-2.18$ ,  $p = 0.04$ ) and following sequential commands (WAB Sequential Commands,  $t=-2.63$ ,  $p = 0.02$ ). Right-predominant cases had significant more behavioral disturbances (CDR-box scores,  $t=-2.67$ ,  $p = 0.01$  and NPI total,  $t=-2.43$ ,  $p = 0.03$ ), less socioemotional sensitivity (RSMS,  $t=3.36$ ,  $p = 0.006$ ), less interpersonal warmth (IAS,  $t=-4.78$ ,  $p = 0.0001$ ), less cognitive empathy (IRI,  $t=3.12$ ,  $p = 0.005$ ), and worse visuo-spatial performance (modified Rey figure delayed copy,  $t=2.81$ ,  $p = 0.009$ ).

Finally, we investigated the relation between atrophy in our novel ROIs and key neuropsychological features (see Figure 5). Reading performance in the irregular words subtest of the PALPA, a proxy for verbal semantic efficiency, correlated with volume loss in all left hemisphere ROIs (and none of the right), with the strongest correlation being detected with the most lateral ROI ( $r = 0.69$ ,  $p = 0.002$ ). Psychiatric symptoms, detected with the NPI and denoting behavioral changes, showed significant correlations with all right hemisphere ROIs (and none of the left), with the strongest correlation being detected with the most medial ROI ( $r = -0.62$ ,  $p = 0.001$ ).

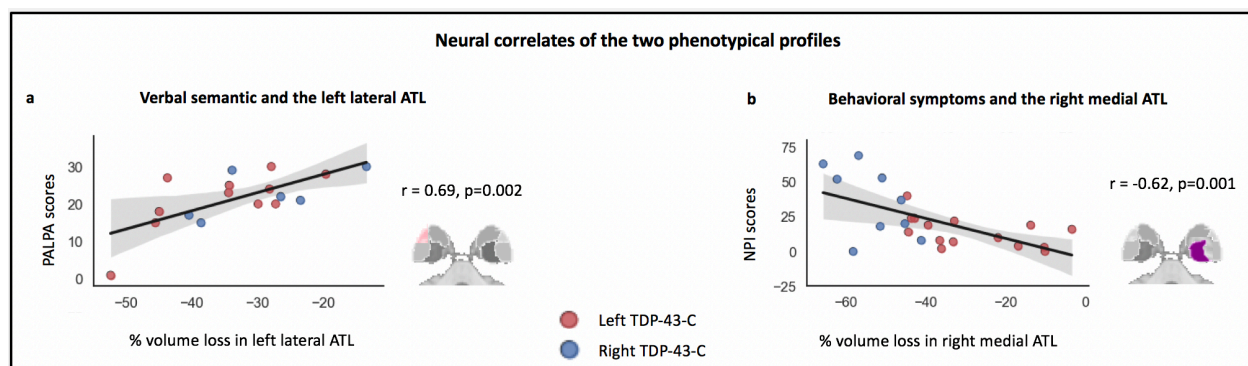

**Figure 5. Neural correlates of the two phenotypical profiles.** A) Scatter plot illustrating the correlation between verbal semantic deficits (as measured with PALPA irregular words reading,  $n = 17$ ) and volume loss in the left lateral ATL. B) Correlation between behavioral symptoms scores (as measured with NPI,  $n = 21$ ) and volume loss in the right medial ATL. Predominantly left cases are depicted with red dots, predominantly right cases with blue ones.

#### 4. Discussion

This study leverages the largest cohort of path-proven TDP-43-C cases clinically described, deepening our understanding of regional temporal lobe susceptibility to this proteinopathy and its effects on cognition. First, we show that predominant right-sided atrophy occurs in up to 40% of cases diagnosed with temporal variants of FTD caused by TDP-43-C. We then provide the first detailed characterization of atrophy distribution within the ATLS, indicating that medial ATL regions are the most vulnerable to TDP-43-C pathology. Finally, we show that atrophy progression is similar irrespective of initial lateralization. Taken together, our findings suggest that, regardless of early clinical and anatomical phenotypical differences, left and right TDP-43-C temporal variants of FTD should be considered the same disease.

Hyper-phosphorylated, ubiquitinated and cleaved forms of TDP-43 are considered the histological hallmark of the majority of ubiquitin-positive, tau-, and alpha-synuclein-negative cases of FTLD (known as FTLD-TDP or FTLD-U) (Cairns et al., 2007; Lagier-Tourenne, Polymenidou, & Cleveland, 2010). In the healthy brain, TDP-43 regulates transcription, alternative splicing, binding and stability of RNA (Cohen, Lee, & Trojanowski, 2011; Tollervey et al., 2011), while its pathological depositions are found in neurodegenerative diseases such as FTD and both familial and sporadic amyotrophic lateral sclerosis (ALS) (Neumann et al., 2006; Sreedharan et al., 2008). Different types of TDP-43 pathology have been identified and are currently classified based on the kind of inclusions and their distribution (I. Mackenzie et al., 2011). Cases with abundance of ubiquitin-positive pathology in upper cortical layers and a preponderance of elongated neuritic profiles over intraneuronal cytoplasmic inclusions are referred to as TDP-43 type C (TDP-43-C), known in previous classification as type 2 (I. R. A. Mackenzie et al., 2006) or type 1 (Sampathu et al., 2006). Previous reports indicate that in-vivo clinical diagnosis of svPPA is associated with TDP-43-C in up to 88% of the cases (Josephs et al., 2011; J. S. Snowden et al., 2011; Spinelli et al., 2017). Conversely, postmortem neuropathological diagnosis of TDP-43-C appears to be constantly associated with svPPA presentation (Rohrer et al., 2010; Whitwell et al., 2010). Our study, leveraging the unique sample offered by the UCSF Memory and Aging Center database and brain bank, adds to these findings by providing strong evidence that early ATL atrophy (irrespective of lateralization), and associated verbal and non-verbal semantic and emotional deficits, are the hallmark presentation of TDP-43-C pathology.

Right predominant temporal atrophy was once considered a rare anatomical form of FTD. Instead, we show that more than 1/3 of our path-proven TDP-43-C cases presented with atrophy lateralized to the right ATL. The first cases of temporal atrophy described in the literature were bilateral with slight left-sided asymmetry (Andersen et



al., 1997; Hodges, Patterson, Oxbury, & Funnell, 1992). These early cases likely reached the attention of neurologists fairly late in the course of the disease, with atrophy already spread to the posterior ATL and orbitofrontal cortex and thus presented with severe language impairments as well as behavioral changes. Increased awareness of the disorder and refined clinical criteria enabled earlier diagnosis and lead to the description of predominantly left vs. right cases (Edwards-Lee et al., 1997; B. L. Miller, Chang, Mena, Boone, & Lesser, 1993; Thompson et al., 2003). The most consistent difference in the clinical presentations is that of more severe anomia in predominantly-left cases, detectable even when groups are matched for cross-modal measures of semantic knowledge (Julie Snowden et al., 2017; Woollams & Patterson, 2017). Early reports, classifying patients based on radiologists' ratings of whole brain CT/MRI scans, suggested a percentage of right-predominant cases around 20% (J Snowden, Thompson, & Neary, 2004; Thompson et al., 2003). Subsequent studies systematically quantified the asymmetry of atrophy and suggested that up to 33% of cases might initially present with right-predominant atrophy (Binney et al., 2016). None of the previous work has focused on path-proven cases. Using bilateral ROIs, we clustered our sample into left-predominant or right-predominant cases, based on data-driven quantitative analyses of GM volume in the two ATLs. Our results suggest that up to 40% of the cases present with initial right-predominant atrophy. The lower prevalence previously reported might be due to diagnostic challenges posed by "atypical", non-linguistic early manifestations of right ATL damage that were likely referred to psychological or psychiatric clinical services because of behavioral disturbances. A neurologist is usually consulted only when atrophy reaches the left temporal lobe and aphasic symptoms become apparent. The brain-behavior correlations illustrated by our ROIs, corroborate previous findings establishing the crucial role played by the right temporal lobe in empathic behavior (R. Perry et al., 2001; Rankin et al., 2006), in particular affect sharing (Shdo et al., 2018), as well as emotions comprehension, especially for negative ones (H. J. Rosen, 2002; Howard J. Rosen et al., 2006).

The biological reasons why the ATLs are vulnerable to FTLD-TDPC pathology is still unknown. Similarly, the biological bases of different patterns of hemispheric lateralization in different individuals is not known. The two cortical regions might differ in their vulnerability to pathology by virtue of structural (or functional) connectivity differences. For instance, left and right ATLs have been associated with somewhat different structural connectivity profiles, with the left ATL being more consistently connected with the inferior frontal gyrus, and the right ATL more strongly connected to orbitofrontal regions (Papinutto et al., 2016). Interestingly, TDP-43 has been associated with a predilection for left temporal structures in primary age-related tauopathy (Josephs et al., 2019), while bilateral temporal involvement is observed in AD (Josephs, 2014), thus further insights might come from a comparison of TDP-43 distribution across dementias. Overall, regional susceptibility likely results from the interplay of numerous variables including cell and genetic vulnerability, structural and functional connections to large-scale networks, as well as environmental factors (Z. A. Miller et al., 2015; Zheng et al., 2018).

Our novel ATL parcellation methodology adds to the findings of ATL regional vulnerability by showing that, irrespective of the hemisphere predominantly affected, atrophy distribution within ATLs describes a gradient whereby medial regions are more affected than lateral ones. This result is consistent with evidence showing that TDP-43 pathology spreads from allocortex to neocortex (Nag et al., 2018), a finding supported by *in vitro* evidence of higher proteotoxicity in the allocortex than in the neocortex (Posimo, Titler, Choi, Unnithan, & Leak, 2013). Animal models have also revealed differences between medial and lateral regions of the temporal pole, with the medial portion presenting the strongest connections to and from the limbic system (Höistad & Barbas, 2008). Recent neuroimaging evidence show a clear distinction between the pattern of connectivity of medial vs. lateral temporal regions (Bajada, Trujillo-barreto, Parker, Cloutman, & Lambon-Ralph, 2019). Bajada and colleagues, comparing the connectivity similarities of regions within the temporal lobe, showed that the lateral temporal lobe is characterized by gradual transitions between regions (making it an ideal convergence zone), while the connectivity profile of the medial temporal lobe (in particular that of the hippocampus) is quite heterogeneous. Our observations complement previous reports indicating the same inferior-to-superior gradient, regardless of atrophy lateralization (Binney et al., 2016), strengthening the conclusion that within ATL pattern of neurodegeneration does not depend on the hemisphere being most affected at initial presentation. However, further studies are necessary to investigate how specific neuropsychological profiles are associated with differential right or left medial vs. lateral atrophy, potentially elucidating the cognitive function subserved by each ATL region. For instance, Vonk and colleagues have described one case in which relative sparing of left dorsolateral ATL might have been sufficient to preserve verbal semantic abilities in a svPPA patient presenting with bilateral but right-predominant atrophy in the medial part of the ATL (Vonk et al., 2019). Taken together, our findings support the hypothesis that TDP-43-C driven neurodegeneration starts in the deep medial temporal structures. Tissue-based studies aiming at understanding the pathophysiology of this disorder should therefore concentrate on these medial regions, regardless of hemispheric lateralization in early disease.

Finally, our comparison of the longitudinal evolution of left-predominant and right-predominant cases indicates that atrophy spreads first to the contralateral hemisphere, then to posterior temporal regions and orbitofrontal ones. These findings not only corroborate prior reports in svPPA (Brambati et al., 2009; Kumfor et al., 2016), but also match recently described stages of TDP pathology spread (Nag et al., 2018). It has been shown that pathology first appears localized to the amygdala, then extends to the hippocampus and entorhinal cortex. Subsequently, it spreads to the ATL, eventually involving midtemporal and orbitofrontal cortices. Only in the most advanced cases does pathology extend to the midfrontal cortex. These neuroanatomical observations are parallel by neuropsychological findings indicating a progressive overlap of the clinical syndromes, being virtually indistinguishable within 3 years from diagnosis (Kumfor et al., 2016; Seeley et al., 2005).

Our findings of bilateral temporal lobe susceptibility to TDP-43-C has important implications for clinical practice in terms of both diagnosis and treatment. Currently, most patients are diagnosed as svPPA if they meet consensus criteria for PPA (Marsel M Mesulam, 2003), and specific criteria for the semantic variant (Gorno-tempini et al., 2011). The latter must show impaired confrontation naming and impaired single-word comprehension, together with at least three of the following: impaired object or face knowledge, surface dyslexia or dysgraphia, spared repetition, or spared speech production. As suggested by previous reports and supported by our findings, left-predominant cases usually meet these criteria, while the diagnosis of right-predominant cases is more difficult, because there are no specific criteria for the right variant of temporal FTD. These patients might be diagnosed with bvFTD if the first (and predominant) symptoms include at least three of the following: behavioral disinhibition, apathy or inertia, loss of sympathy or empathy, perseverative or compulsive behavior, hyperorality and dietary changes, or executive deficits (Rascovsky et al., 2011). As described earlier, this is often the case. Alternatively, they might be assigned the label of right variant svPPA if nonverbal semantic deficits are investigated and detected, even though consensus criteria for such a variant does not currently exist. It should be noted that, as in our sample, most of these right-predominant patients would meet Neary criteria for SD (1988) and svPPA (anomia and semantic deficits for objects or faces) but not Mesulam criteria for general PPA, as language deficits might not be the first complaint. Finally, many patients with right-predominant temporal variant of FTD were first referred to psychiatric care when behavioral symptoms are preponderant and not framed in the context of a progressive deterioration of the cognitive profile (M. F. Mendez & Perryman, 2002). Certainly, the clinical profile of svPPA and bvFTD patients greatly overlaps (Blair, Marcizinski, Davis-Faroque, & Kertesz, 2007). Language impairments are not rare in bvFTD patients (Hardy et al., 2016), and only subtle behavioral symptoms analyses can discriminate right temporal from right frontal FTD cases: the former show increased mental rigidity and depression, while the latter exhibit greater disinhibition (Bozeat, Gregory, Lambon Ralph, & Hodges, 2000). Overall, the diagnosis of bvFTD appears to be one of the most difficult and least stable over time within the FTD spectrum (D. C. Perry et al., 2019). Separating the right-temporal variant from bvFTD might help simplify this complex scenario.

Overall, our results suggest that TDP-43-C driven temporal variant FTD should be suspected when patients' clinical presentation includes either symptoms indicative of a left ATL involvement, such as poor confrontation naming and single word comprehension, or indicative of right ATL damage, such as a lack of socioemotional sensitivity or empathy and loss of semantic knowledge for faces and known people. If neuro-anatomical data are available, clinicians should assess the degree of asymmetric ATL involvement, and whether the gradient is medial-to-lateral. This can inform on which additional cognitive and behavioral manifestations are to be expected. It should be stressed that while svPPA/temporal variant FTD are overwhelmingly associated with TDP-43-C, bvFTD presents considerably more pathological variability (D. C. Perry et al., 2017). The identification of *in vivo* features that predict a pathological diagnosis is increasingly important, as pharmacological trials targeting specific proteinopathy emerge. In the future, diagnostic help could come from [18F]AV-1451 PET (so called TAU PET) which seems to bind to bilateral

temporal lobe pathology in svPPA cases, but does not show frontal/temporal binding in bvFTD (Bevan-Jones et al., 2018; Josephs et al., 2018; Makaretz et al., 2018). However, to date no biomarker for TDP-43 exists (Steinacker, Barschke, & Otto, 2018), so the integration of clinical and neuroimaging findings are still the best way to diagnose these patients. To this end, updating the currently available criteria would be beneficial. Regarding therapy trials, the implications of our findings are two-folds. First, information on the most likely underlying proteinopathy is crucial to decide which patients to include, and our results suggest that all patients presenting with temporal variant of FTD, irrespective of atrophy lateralization, should be treated as highly probable TDP-43-C cases (and thus included for drugs targeting TDP). Second, knowledge of the longitudinal atrophy progression patterns suggests which cortical regions should be monitored to assess whether a particular treatment is slowing the spread of atrophy. Atrophy progression should be tracked by mapping the progressive involvement of the ipsilateral lateral ATL, ipsilateral posterior temporal areas, and contralateral hemisphere.

Despite the robust size of this pathology-proven cohort, future studies including more subjects are warranted. Moreover, this retrospective, path confirmed study includes relatively old cases, so the neuropsychological data available do not include more recent measures such as Famous Faces Naming (Borghesani et al., 2019) or Emotion Processing tasks (Kumfor et al., 2018). Larger samples, including the more targeted neuropsychological tests now available, will allow more refined investigation of the neural correlates of specific phenotypical characteristics of TDP-43-C driven temporal FTDs.

In conclusion, we showed that TDP-43-C associated FTD cases might present with predominantly right ATL atrophy in up to one third of cases, yet exhibit the same atrophy distribution within, and longitudinal spread outside, the ATLs. Specifically, the medial portion of the ATLs appear to be particularly susceptible to TDP-43-C driven neurodegeneration. Moreover, temporal FTD cases share mirrored longitudinal atrophy progression patterns and, critically, common neuropathological correlates. Hence, the different behavioral and cognitive presentations, explained by early atrophy lateralization, should not be considered different nosological entities, but rather guide the development of clinical criteria that better describes both left and right phenotypes of temporal FTD.

## **Acknowledgements**

The authors thank the patients and their families for the time and effort they dedicated to the research. We thank Anna Karydas for assistance with genetic data. The authors declare no competing financial interests.

## **Funding**

This work was funded by the National Institutes of Health (NINDS R01NS050915, NIDCD K24DC015544, NIDCD R03DC013403, NIDCD F32DC009145, NIA U01AG052943, NIA P50AG023501, NIA P01AG019724, NIA R01AG038791, NINDS U54NS092089, NIA K08AG052648), Alzheimer's Disease Research Center of California (03-75271 DHS/ADP/ARCC); Larry L. Hillblom Foundation; John Douglas French Alzheimer's Foundation; Koret Family Foundation; Consortium for Frontotemporal Dementia Research; and McBean Family Foundation. LTG is partially funded by NIH K24AG053435. These supporting sources were not involved in the study design, collection, analysis or interpretation of data, nor were they involved in writing the paper or in the decision to submit this report for publication.

Tables:

|                                      | All TDP-C <sup>a</sup><br>Avg(std) | #  | Predominantly L<br>Ave(std) | #     | Predominantly R<br>Ave(std) |
|--------------------------------------|------------------------------------|----|-----------------------------|-------|-----------------------------|
| <b>Demographics</b>                  |                                    |    |                             |       |                             |
| N                                    | 37                                 |    | 18                          |       | 12                          |
| Gender (M:F)                         | 21:16                              |    | 12:6                        |       | 6:6                         |
| Handness (R:L)                       | 33:4                               |    | 16:2                        |       | 10:2                        |
| Education (y)                        | 16.11 (3.11)                       | 37 | 16.44 (3.13)                | 18:12 | 16.75 (2.95)                |
| Age at testing (y)                   | 64.68 (7.48)                       | 37 | 64.11 (7.10)                | 18:12 | 62.58 (5.65)                |
| Age at estimated onset (y)           | 60.06 (8.52)                       | 32 | 59.59 (7.87)                | 17:8  | 57.13 (8.12)                |
| <b>General cognition</b>             |                                    |    |                             |       |                             |
| CDR                                  | 0.84 (0.57) *                      | 32 | 0.69 (0.56) *               | 16:11 | 0.91 (0.56) *               |
| CDR - box score                      | 4.25 (2.93) *                      | 32 | 2.75 (2.77) *               | 16:11 | 5.50 (2.30) *               |
| MMSE (30)                            | 22.05 (7.26) *                     | 37 | 22.72 (6.53) *              | 18:12 | 24.92 (4.35) *              |
| <b>Executive functioning</b>         |                                    |    |                             |       |                             |
| Digit Span - backward                | 4.74 (1.08)                        | 31 | 4.93 (0.93)                 | 15:11 | 5.00 (1.13)                 |
| Stroop (correct in 60 seconds)       | 31.70 (14.79) *                    | 27 | 30.23 (13.99) *             | 13:9  | 39.44 (12.24) *             |
| Modified Trails (n. of line/min)     | 11.68 (4.67) *                     | 31 | 13.31 (2.20) *              | 16:11 | 10.82 (5.29) *              |
| Design Fluency                       | 6.48 (3.71) *                      | 27 | 7.00 (3.51) *               | 12:11 | 7.09 (3.73) *               |
| <b>Visuospatial processing</b>       |                                    |    |                             |       |                             |
| Benson Figure Copy (17)              | 14.77 (3.07)                       | 35 | 15.88 (1.28)                | 17:12 | 14.25 (3.00)                |
| Calculations (5)                     | 4.33 (1.20) *                      | 36 | 4.76 (0.55)                 | 17:12 | 4.58 (0.49) *               |
| VOSP Number Location                 | 8.70 (1.49) *                      | 23 | 9.05 (1.16) *               | 11:8  | 8.63 (1.41) *               |
| <b>Episodic Memory</b>               |                                    |    |                             |       |                             |
| CVLT-SF 30" Delay (9)                | 2.52 (2.26) *                      | 33 | 2.24 (2.13) *               | 17:11 | 3.64 (2.19) *               |
| CVLT-SF 10" Delay (9)                | 2.13 (2.34) *                      | 32 | 1.63 (2.18) *               | 16:11 | 2.91 (2.27) *               |
| CVLT-SF Recognition (9)              | 5.59 (2.57) *                      | 32 | 5.00 (2.94) *               | 16:11 | 6.45 (2.10) *               |
| Benson Copy 10' Delay (17)           | 6.62 (4.17) *                      | 34 | 8.88 (3.57)                 | 16:12 | 4.92 (3.52) *               |
| <b>Language</b>                      |                                    |    |                             |       |                             |
| Apraxia of Speech Rating (7)         | 0                                  |    | 0                           |       | 0                           |
| Dysarthria Rating (7)                | 0                                  |    | 0                           |       | 0                           |
| Verbal fluency - phonemic (d-words)  | 6.81 (2.87) *                      | 32 | 6.82 (3.26) *               | 17:10 | 7.10 (1.51) *               |
| WAB Auditory Word Recognition (60)   | 51.95 (13.27) *                    | 20 | 53.30 (6.78) *              | 10:8  | 56.00 (4.72) *              |
| WAB Sequential Command (80)          | 69.94 (16.36)                      | 18 | 62.70 (19.00) *             | 10:7  | 79.43 (1.40) *              |
| WAB Repetition Total (100)           | 90.44 (9.82) *                     | 18 | 87.00 (11.64) *             | 10:7  | 95.00 (4.00) *              |
| PALPA - Reading Regular Words (30)   | 26.94 (4.75) *                     | 18 | 27.27 (5.41) *              | 11:6  | 26.33 (3.68) *              |
| <b>Semantic knowledge</b>            |                                    |    |                             |       |                             |
| PPVT (16)                            | 8.40 (3.40) *                      | 15 | 7.50 (3.61) *               | 8:6   | 9.33 (3.04) *               |
| PPT words (52)                       | 38.47 (8.07) *                     | 17 | 37.45 (9.43) *              | 11:5  | 40.8 (4.26) *               |
| PPT pictures (52)                    | 38.1 (7.82) *                      | 29 | 39.0 (7.45) *               | 16:12 | 36.58 (8.31) *              |
| Verbal fluency - semantic (animals)  | 6.64 (3.64) *                      | 33 | 6.00 (3.20) *               | 17:11 | 8.36 (4.18) *               |
| PALPA - Reading Irregular Words (30) | 21.33 (6.84) *                     | 18 | 21.0 (7.64) *               | 11:6  | 22.33 (5.59) *              |
| Abbreviated BNT (15)                 | 4.63 (4.13) *                      | 35 | 3.47 (1.75) *               | 17:12 | 6.25 (4.13) *               |
| <b>Socio-emotional functioning</b>   |                                    |    |                             |       |                             |
| NPI Total (severity * frequency)     | 22.78 (18.70)                      | 27 | 14.13 (10.51)               | 15:9  | 35.56 (23.62) *             |
| NPI Caregivers Distress              | 10.23 (8.54)                       | 31 | 7.73 (5.05)                 | 15:10 | 17.60 (8.95) *              |
| RSMS (65)                            | 35.56 (15.09) *                    | 16 | 42.30 (15.09) *             | 10:6  | 24.33 (3.40) *              |
| IAS - current trait warmth           | 26.72 (27.73) *                    | 27 | 42.03 (22.59) *             | 16:9  | 2.28 (16.77) *              |
| IRI - Cognitive Empathy              | 11.77 (2.53) *                     | 24 | 13.17 (2.36) *              | 12:9  | 10.06 (1.98) *              |
| IRI - Emotional Empathy              | 19.83 (4.98) *                     | 24 | 20.75 (4.44)                | 12:9  | 18.61 (4.24) *              |

<sup>a</sup> = includes cases for which neuroimaging data was not available; # = number of patients for which each given measure is available; \* = statistical difference from HC; ^ = statistical difference between left and right TDP-43-C

**Table 1. Demographic and neuropsychological characteristics of the participants.** Scores shown are mean (standard deviation), with asterisks (\*) indicate values significantly different from controls, and carets (^) statistical differences between predominantly left and right TDP-43-C cases. CDR = Clinical Dementia Rating; MMSE = Mini Mental State Exam; VOSP = Visual Object and Space Perception Battery; CVLT-SF = California Verbal Learning Test-Short Form; WAB = Western Aphasia Battery; PALPA = Psycholinguistic Assessments of Language Processing Abilities; PPVT = Peabody Picture Vocabulary; PPT = Pyramid and Palms Tree; BNT = Boston Naming Test; NPI = Neuropsychiatric Inventory; RSMS = Revised Self-monitoring Scale; IAS = Interpersonal Adjective Scales; IRI = Interpersonal Reactivity Index.

## References

- Andersen, C., Dahl, C., Almkvist, O., Ostberg, P., Julin, P., & Wahlund, L.-O. (1997). Bilateral Temporal Lobe Volume Reduction Parallels Cognitive Impairment in Progressive Aphasia. *Annals of Neurology*, *54*, 1294–1299.
- Bajada, C. J., Trujillo-barreto, N. J., Parker, G. J. M., Cloutman, L. L., & Lambon-Ralph, M. A. (2019). A structural connectivity convergence zone in the ventral and anterior temporal lobes: data-driven evidence from structural imaging. *Cortex*. <https://doi.org/10.1016/j.cortex.2019.06.014>
- Barbarotto R, Capitani E, Spinnler H, T. C. (1995). Slowly progressive semantic impairment with category specificity. *Neurocase*, *1*, 107–19.
- Bevan-Jones, W. R., Cope, T. E., Simon Jones, P., Passamonti, L., Hong, Y. T., Fryer, T. D., ... Rowe, J. B. (2018). AV-1451 binding in vivo mirrors the expected distribution of TDP-43 pathology in the semantic variant of primary progressive aphasia. *Journal of Neurology, Neurosurgery and Psychiatry*, *89*(10), 1032–1037. <https://doi.org/10.1136/jnnp-2017-316402>
- Bigler, E. D. (2007). Anterior and Middle Cranial Fossa in Traumatic Brain Injury: Relevant Neuroanatomy and Neuropathology in the Study of Neuropsychological Outcome. *Neuropsychology*, *21*(5), 515–531. <https://doi.org/10.1037/0894-4105.21.5.515>
- Binney, R. J., Embleton, K. V., Jefferies, E., Parker, G. J. M., & Lambon Ralph, M. A. (2010). The ventral and inferolateral aspects of the anterior temporal lobe are crucial in semantic memory: Evidence from a novel direct comparison of distortion-corrected fMRI, rTMS, and semantic dementia. *Cerebral Cortex*, *20*(11), 2728–2738. <https://doi.org/10.1093/cercor/bhq019>
- Binney, R. J., Henry, M. L., Babiak, M., Pressman, P. S., Santos-Santos, M. A., Narvid, J., ... Gorno-Tempini, M. L. (2016). Reading words and other people: A comparison of exception word, familiar face and affect processing in the left and right temporal variants of primary progressive aphasia. *Cortex*, *82*, 147–163. <https://doi.org/10.1016/j.cortex.2016.05.014>
- Blair, M., Marczyński, C. A., Davis-Faroque, N., & Kertesz, A. (2007). A longitudinal study of language decline in Alzheimer's disease and frontotemporal dementia. *Journal of the International Neuropsychological Society*, *13*(2), 237–245. <https://doi.org/10.1017/S1355617707070269>
- Borghesani, V., Narvid, J., Battistella, G., Shwe, W., Watson, C., Binney, R. J., ... Gorno-Tempini, M. L. (2019). “Looks familiar, but I do not know who she is”: The role of the anterior right temporal lobe in famous face recognition. *Cortex*, *115*, 72–85. <https://doi.org/10.1016/j.cortex.2019.01.006>
- Bozeat, S., Gregory, C. A., Lambon Ralph, M. A., & Hodges, J. R. (2000). Which neuropsychiatric and behavioural

- features distinguish frontal and temporal variants of frontotemporal dementia from Alzheimer's disease? *Journal of Neurology Neurosurgery and Psychiatry*, 69(2), 178–186. Retrieved from <http://ovidsp.ovid.com/ovidweb.cgi?T=JS&PAGE=reference&D=emed5&NEWS=N&AN=2000256772>
- Brambati, S. M., Rankin, K. P., Narvid, J., Seeley, W. W., Dean, D., Rosen, H. J., ... Gorno-Tempini, M. L. (2009). Atrophy progression in semantic dementia with asymmetric temporal involvement: A tensor-based morphometry study. *Neurobiology of Aging*, 30(1), 103–111. <https://doi.org/10.1016/j.neurobiolaging.2007.05.014>
- Brown, J. A., Neuhaus, J., Miller, B. L., Rosen, H. J., Seeley, W. W., Brown, J. A., ... Seeley, W. W. (2019). Patient-Tailored, Connectivity-Based Forecasts of Spreading Brain Atrophy. *Neuron*, 104, 1–13. <https://doi.org/10.1016/j.neuron.2019.08.037>
- Butler, C. R., Brambati, S. M., Miller, B. L., & Gorno-Tempini, M.-L. (2009). The neural correlates of verbal and non-verbal semantic processing deficits in neurodegenerative disease. *Cognitive and Behavioral Neurology: Official Journal of the Society for Behavioral and Cognitive Neurology*, 22(2), 73–80. <https://doi.org/10.1038/jid.2014.371>
- Cairns, N. J., Neumann, M., Bigio, E. H., Holm, I. E., Troost, D., Hatanpaa, K. J., ... Mackenzie, I. R. A. (2007). TDP-43 in familial and sporadic frontotemporal lobar degeneration with ubiquitin inclusions. *American Journal of Pathology*, 171(1), 227–240. <https://doi.org/10.2353/ajpath.2007.070182>
- Chabardès, S., Kahane, P., Minotti, L., Tassi, L., Grand, S., Hoffmann, D., & Benabid, A. L. (2005). The temporopolar cortex plays a pivotal role in temporal lobe seizures. *Brain*, 128(8), 1818–1831. <https://doi.org/10.1093/brain/awh512>
- Chan, D., Anderson, V., Pijnenburg, Y., Whitwell, J., Barnes, J., Scahill, R., ... Fox, N. C. (2009). The clinical profile of right temporal lobe atrophy. *Brain*, 132(5), 1287–1298. <https://doi.org/10.1093/brain/awp037>
- Chan, D., Fox, N. C., Scahill, R. I., Crum, W. R., Whitwell, J. L., Leschziner, G., ... Rossor, M. N. (2001). Patterns of temporal lobe atrophy in semantic dementia and Alzheimer's disease. *Annals of Neurology*, 49(4), 433–442. <https://doi.org/10.1002/ana.92>
- Chen, K., Ding, J., Lin, B., Huang, L., Tang, L., Bi, Y., & Han, Z. (2018). The neuropsychological profiles and semantic-critical regions of right semantic dementia. *NeuroImage : Clinical*, 19(February), 767–774.
- Cohen, T. J., Lee, V. M. Y., & Trojanowski, J. Q. (2011). TDP-43 functions and pathogenic mechanisms implicated in TDP-43 proteinopathies. *Trends in Molecular Medicine*, 17(11), 659–667. <https://doi.org/10.1016/j.molmed.2011.06.004>
- Ding, S. L., Van Hoesen, G. W., Cassell, M. D., & Poremba, A. (2009). *Parcellation of human temporal polar cortex: a*



*combined analysis of multiple cytoarchitectonic, chemoarchitectonic, and pathological markers.* (Vol. 514).

[https://doi.org/10.1016/S0140-6736\(02\)11602-3](https://doi.org/10.1016/S0140-6736(02)11602-3).Association

Edwards-Lee, T., Miller, B. L., Benson, F., Cummings, J. L., Russell, G. L., Boone, K., & Mena, I. (1997). The temporal variant of frontotemporal dementia. *Brain*, *120*(June), 1027–1040.

Elahi, F. M., & Miller, B. L. (2017). A clinicopathological approach to the diagnosis of dementia. *Nature Reviews Neurology*, *13*(8), 457–476. <https://doi.org/10.1038/nrneurol.2017.96>

Gainotti, G., Barbier, A., & Marra, C. (2003). Slowly progressive defect in recognition of familiar people in a patient with right anterior temporal atrophy. *Brain*, *126*(4), 792–803. <https://doi.org/10.1093/brain/awg092>

Galton, C., Patterson, K., Graham, K., Lambon-Ralph, M., Williams, G., Antoun, N., ... Hodges, J. (2001). Differing patterns of temporal atrophy in Alzheimer's disease and semantic Differing patterns of temporal atrophy in Alzheimer's disease and semantic dementia. *Neurology*, *57*(2), 216–225. <https://doi.org/10.1212/WNL.57.2.216>

Gorno-tempini, M. L., Hillis, A. E., Weintraub, S., Kertesz, A., Mendez, M., Cappa, S., ... Grossman, M. (2011). Classification of primary progressive aphasia and its variants. *Neurology*, *02*, 1–10.

Gorno-Tempini, M., Dronkers, N., Rankin, K., Ogar, J., Phengrasamy, L., Rosen, H., ... Miller, B. (2004). Cognition and anatomy in three variants of primary progressive aphasia. *Annals of Neurology*, *55*(3), 335–346. <https://doi.org/10.1016/j.cell.2005.10.002>

Gorno-Tempini, ML, Rankin, K., Woolley, J., Rosen, H., Phengrasamy, L., & Miller, B. (2004). Cognitive and behavioral profile in a case of right anterior temporal lobe neurodegeneration. *Cortex*, *40*(4–5), 631–644.

Hardy, C. J. D., Buckley, A. H., Downey, L. E., Lehmann, M., Zimmerer, V. C., Varley, R. A., ... Warren, J. D. (2016). The language profile of behavioral variant frontotemporal dementia. *Journal of Alzheimer's Disease*, *50*(2), 359–371. <https://doi.org/10.3233/JAD-150806>

Henry, M. L. (2014). Neuropsychological, behavioral, and anatomical evolution in right temporal variant frontotemporal dementia: A longitudinal and post-mortem single case analysis. *Neurocase*, *34*(2), 733–742. <https://doi.org/10.1017/S1368980009991996>.Validation

Hodges, J. R., Mitchell, J., Dawson, K., Spillantini, M. G., Xuereb, J. H., Mcmonagle, P., ... Patterson, K. (2010). Semantic dementia: demography, familial factors and survival in a consecutive series of 100 cases. *Brain*, *133*(2009), 300–306. <https://doi.org/10.1093/brain/awp248>

Hodges, J. R., Patterson, K., Oxbury, S., & Funnell, E. (1992). Semantic dementia. Progressive fluent aphasia with temporal lobe atrophy. *Brain*, *115*, 1783–1806. <https://doi.org/10.1093/brain/115.6.1783>

- Höistad, M., & Barbas, H. (2008). Sequence of information processing for emotions through pathways linking temporal and insular cortices with the amygdala. *NeuroImage*, *40*(3), 1016–1033.  
<https://doi.org/10.1016/j.neuroimage.2007.12.043>
- Josephs, K. A. (2014). TDP-43 is a key player in the clinical features associated with Alzheimer's disease. *Acta Neuropathol*, *127*(6), 811–824. <https://doi.org/10.1371/journal.pone.0178059>
- Josephs, K. A., Hodges, J. R., Snowden, J. S., Mackenzie, I. R., Neumann, M., Mann, D. M., & Dickson, D. W. (2011). Neuropathological background of phenotypical variability in frontotemporal dementia Semantic dementia, 137–153. <https://doi.org/10.1007/s00401-011-0839-6>
- Josephs, K. A., Martin, P. R., Botha, H., Schwarz, C. G., Duffy, J. R., Clark, H. M., ... Whitwell, J. L. (2018). [ 18 F]AV-1451 tau-PET and primary progressive aphasia. *Annals of Neurology*, *83*(3), 599–611.  
<https://doi.org/10.1002/ana.25183>
- Josephs, K. A., Murray, M. E., Tosakulwong, N., Weigand, S. D., Knopman, D. S., Petersen, R. C., ... Dickson, D. W. (2019). Brain atrophy in primary age-related tauopathy is linked to transactive response DNA-binding protein of 43 kDa. *Alzheimer's and Dementia*, *1*, 1–8. <https://doi.org/10.1016/j.jalz.2019.03.003>
- Joubert, S., Felician, O., Barbeau, E., Sontheimer, A., Guedj, E., Ceccaldi, M., & Poncet, M. (2004). Progressive prosopagnosia: Clinical and neuroimaging results. *Neurology*, *63*(10), 1962–1965.  
<https://doi.org/10.1212/01.WNL.0000144347.40132.6A>
- Kapur, N., Barker, S., Burrows, E. H., Ellison, D., Brice, J., Illis, L. S., ... Loates, M. (1994). Herpes simplex encephalitis: long term magnetic resonance imaging and neuropsychological profile. *Journal of Neurology, Neurosurgery & Psychiatry*, *57*(11), 1334–1342. <https://doi.org/10.1136/jnnp.57.11.1334>
- Kovacs, G. G., Ferrer, I., Grinberg, L. T., Alafuzoff, I., Attems, J., Budka, H., ... Dickson, D. W. (2016). Aging-related tau astroglialopathy (ARTAG): harmonized evaluation strategy. *Acta Neuropathologica*, *131*(1), 87–102.  
<https://doi.org/10.1007/s00401-015-1509-x>
- Kramer, J. H., Jurik, J., Sha, S. J., Rankin, K. P., Rosen, H. J., Johnson, J. K., & Miller, B. L. (2003). Distinctive Neuropsychological Patterns in Frontotemporal Dementia, Semantic Dementia, and Alzheimer Disease. *Cognitive and Behavioral Neurology*, *16*(4), 211–218. <https://doi.org/10.1097/00146965-200312000-00002>
- Kumfor, F., Ibañez, A., Hutchings, R., Hazelton, J. L., Hodges, J. R., & Piguet, O. (2018). Beyond the face: How context modulates emotion processing in frontotemporal dementia subtypes. *Brain*, *141*(4), 1172–1185.  
<https://doi.org/10.1093/brain/awy002>
- Kumfor, F., Landin-Romero, R., Devenney, E., Hutchings, R., Grasso, R., Hodges, J. R., & Piguet, O. (2016). On the right side? A longitudinal study of left- versus right-lateralized semantic dementia. *Brain*, *139*(3), 986–998.

<https://doi.org/10.1093/brain/awv387>

Lagier-Tourenne, C., Polymenidou, M., & Cleveland, D. W. (2010). TDP-43 and FUS/TLS: Emerging roles in RNA processing and neurodegeneration. *Human Molecular Genetics*, *19*(R1), 46–64.

<https://doi.org/10.1093/hmg/ddq137>

Lambon Ralph, M. a, McClelland, J. L., Patterson, K., Galton, C. J., & Hodges, J. R. (2001). No right to speak? The relationship between object naming and semantic impairment: neuropsychological evidence and a computational model. *Journal of Cognitive Neuroscience*, *13*(3), 341–356.

<https://doi.org/10.1162/08989290151137395>

Li, Y., Chen, J. A., Sears, R. L., Gao, F., Klein, E. D., Karydas, A., ... Coppola, G. (2014). An Epigenetic Signature in Peripheral Blood Associated with the Haplotype on 17q21.31, a Risk Factor for Neurodegenerative Tauopathy. *PLoS Genetics*, *10*(3). <https://doi.org/10.1371/journal.pgen.1004211>

Mackenzie, I., Neumann, M., Baborie, A., Sampathu, D., Du Plessis, D., Jaros, E., ... Lee, V. (2011). A harmonized classification system for FTLD-TDP pathology. *Acta Neuropathol.*, *122*(1), 111–113.

<https://doi.org/10.1007/s00401-011-0845-8.A>

Mackenzie, I. R. A., Baborie, A., Pickering-Brown, S., Plessis, D. Du, Jaros, E., Perry, R. H., ... Mann, D. M. A. (2006). Heterogeneity of ubiquitin pathology in frontotemporal lobar degeneration: Classification and relation to clinical phenotype. *Acta Neuropathologica*, *112*(5), 539–549. <https://doi.org/10.1007/s00401-006-0138-9>

Makretz, S. J., Quimby, M., Collins, J., Makris, N., McGinnis, S., Schultz, A., ... Dickerson, B. C. (2018). Flortaucipir tau PET imaging in semantic variant primary progressive aphasia. *Journal of Neurology, Neurosurgery and Psychiatry*, *89*(10), 1024–1031. <https://doi.org/10.1136/jnnp-2017-316409>

McCarthy, R. A., & Warrington, E. K. (2016). Past, present, and prospects: Reflections 40 years on from the selective impairment of semantic memory (Warrington, 1975). *Quarterly Journal of Experimental Psychology*, *69*(10), 1941–1968. <https://doi.org/10.1080/17470218.2014.980280>

McKeith, I. G., Galasko, D., Kosaka, K., Perry, E. K., Dickson, D. W., Hansen, L. A., ... Perry, R. H. (1996). Consensus guidelines for the clinical and pathologic diagnosis of dementia with Lewy bodies (DLB): Report of the consortium on DLB international workshop. *Neurology*, *47*(5), 1113–1124.

<https://doi.org/10.1212/WNL.47.5.1113>

Mendez, M. F., & Ghajarnia, M. (2001). Agnosia for familiar faces and odors in a patient with right temporal lobe dysfunction. *Neurology*, *57*(3), 519–521. <https://doi.org/10.1212/WNL.57.3.519>

Mendez, M. F., & Perryman, K. M. (2002). Neuropsychiatric Features of Frontotemporal Dementia: Evaluation of Consensus Criteria and Review. *Journal of Neuropsychiatry*, *14*(4), 424–429.

<https://doi.org/10.1176/appi.neuropsych.14.4.424>

Mendez, M., Kremen, S., Tsai, P.-H., & Shapira, J. (2010). Interhemispheric Differences in Knowledge of Animals Among Patients With Semantic Dementia Mario. *Cogn Behav Neurol.*, *23*(4), 240–246.

<https://doi.org/10.1038/jid.2014.371>

Mesulam, M. Marsel, Wieneke, C., Hurley, R., Rademaker, A., Thompson, C. K., Weintraub, S., & Rogalski, E. J. (2013). Words and objects at the tip of the left temporal lobe in primary progressive aphasia. *Brain*, *136*(2), 601–618. <https://doi.org/10.1093/brain/aws336>

Mesulam, Marsel M. (2003). Primary Progressive Aphasia — A Language-Based Dementia, 1535–1542.

Miller, B. L., Chang, L., Mena, I., Boone, K., & Lesser, I. M. (1993). Progressive right frontotemporal degeneration: Clinical, neuropsychological and SPECT characteristics. *Dementia*, *4*(3–4), 204–213.

<https://doi.org/10.1159/000107324>

Miller, B. L., Cummings, J. L., Villanueva-Meyer, J., Boone, K., Mehninger, C., Lesser, I., & Mena, I. (1991). Frontal lobe degeneration: clinical, neuropsychological, and SPECT characteristics. *Neurology*, *41*(9), 1374.

Miller, Z. A., Hinkley, L. B., Herman, A., Honma, S., Findlay, A., Block, N., ... Gorno-Tempini, M. L. (2015). Anomalous functional language lateralization in semantic variant PPA. *Neurology*, *84*(2), 204–206.

<https://doi.org/10.1212/WNL.0000000000001131>

Mion, M., Patterson, K., Acosta-Cabronero, J., Pengas, G., Izquierdo-Garcia, D., Hong, Y. T., ... Nestor, P. J. (2010). What the left and right anterior fusiform gyri tell us about semantic memory. *Brain*, *133*(11), 3256–3268.

<https://doi.org/10.1093/brain/awq272>

Montine, T. J., Phelps, C. H., Beach, T. G., Bigio, E. H., Cairns, N. J., Dickson, D. W., ... Hyman, B. T. (2012). National institute on aging-Alzheimer's association guidelines for the neuropathologic assessment of Alzheimer's disease: A practical approach. *Acta Neuropathologica*, *123*(1), 1–11. <https://doi.org/10.1007/s00401-011-0910-3>

Moreno, F., Rabinovici, G. D., Karydas, A., Miller, Z., Hsu, S. C., Legati, A., ... Grinberg, L. T. (2015). A novel mutation P112H in the TARDBP gene associated with frontotemporal lobar degeneration without motor neuron disease and abundant neuritic amyloid plaques. *Acta Neuropathologica Communications*, *3*, 19.

<https://doi.org/10.1186/s40478-015-0190-6>

Mummery, C., Patterson, K., Price, C. J., Ashburner, J., Frackowiak, R. S. J., & Hodges, J. R. (2000). A voxel-based morphometry study of semantic dementia: Relationship between temporal lobe atrophy and semantic memory. *Annals of Neurology*, *47*(1), 36–45. [https://doi.org/10.1002/1531-8249\(200001\)47:1<36::AID-ANA8>3.0.CO;2-L](https://doi.org/10.1002/1531-8249(200001)47:1<36::AID-ANA8>3.0.CO;2-L)

- Murray, E. A., & Richmond, B. J. (2001). Role of perirhinal cortex in object perception, memory, and associations. *Current Opinion in Neurobiology*, *11*(2), 188–193. [https://doi.org/10.1016/S0959-4388\(00\)00195-1](https://doi.org/10.1016/S0959-4388(00)00195-1)
- Nag, S., Yu, L., Boyle, P. A., Leurgans, S. E., Bennett, D. A., & Schneider, J. A. (2018). TDP-43 pathology in anterior temporal pole cortex in aging and Alzheimer’s disease. *Acta Neuropathologica Communications*, *6*(1), 33. <https://doi.org/10.1186/s40478-018-0531-3>
- Neary, D., Snowden, J. S., Gustafson, L., Passant, U., Stuss, D., Black, S. A., ... Boone, K. (1998). Frontotemporal lobar degeneration: a consensus on clinical diagnostic criteria. *Neurology*, *51*(6), 1546–1554. <https://doi.org/10.1212/WNL.51.6.1546>
- Neary, D., Snowden, J. S., Gustafson, L., Passant, U., Stuss, D., Black, S., ... Benson, D. F. (1998). Frontotemporal lobar degeneration: A consensus on clinical diagnostic criteria. *Neurology*, *51*(6), 1546–1554. <https://doi.org/10.1212/WNL.51.6.1546>
- Nestor, P. J., Fryer, T. D., & Hodges, J. R. (2006). Declarative memory impairments in Alzheimer’s disease and semantic dementia. *NeuroImage*, *30*(3), 1010–1020. <https://doi.org/10.1016/j.neuroimage.2005.10.008>
- Neumann, M., Sampathu, D. M., Kwong, L. K., Truax, A. C., Micsenyi, M. C., Chou, T. T., ... Lee, V. M.-Y. (2006). Ubiquitinated TDP-43 in Frontotemporal Lobar Degeneration and Amyotrophic Lateral Sclerosis. *Science*, *314*(5796), 130–133. <https://doi.org/10.1126/science.1134108>
- Olson, I. R., Plotzker, A., & Ezzyat, Y. (2007). The Enigmatic temporal pole: A review of findings on social and emotional processing. *Brain*, *130*(7), 1718–1731. <https://doi.org/10.1093/brain/awm052>
- Papinutto, N., Galantucci, S., Mandelli, M. L., Gesierich, B., Jovicich, J., Caverzasi, E., ... Gorno-Tempini, M. L. (2016). Structural connectivity of the human anterior temporal lobe: A diffusion magnetic resonance imaging study. *Human Brain Mapping*, *37*(6), 2210–2222. <https://doi.org/10.1002/hbm.23167>
- Pascual, B., Masdeu, J. C., Hollenbeck, M., Makris, N., Insausti, R., Ding, S., & Dickerson, B. C. (2015). Large-Scale Brain Networks of the Human Left Temporal Pole : A Functional Connectivity MRI Study, (March), 680–702. <https://doi.org/10.1093/cercor/bht260>
- Perry, D. C., Brown, J. A., Possin, K. L., Datta, S., Trujillo, A., Radke, A., ... Seeley, W. W. (2017). Clinicopathological correlations in behavioural variant frontotemporal dementia. *Brain*, *140*(12), 3329–3345. <https://doi.org/10.1093/brain/awx254>
- Perry, D. C., Datta, S., Miller, Z. A., Rankin, K. P., Luisa, M., Tempini, G., ... Miller, B. L. (2019). Factors that predict diagnostic stability in neurodegenerative dementia. *Journal of Neurology*, (0123456789). <https://doi.org/10.1007/s00415-019-09362-5>

- Perry, R., Rosen, H., Kramer, J., Beer, J., Levenson, R., & Miller, B. (2001). Hemispheric Dominance for Emotions, Empathy and Social Behaviour: Evidence from Right and Left Handers with Frontotemporal Dementia. *Neurocase*, 7(2), 145–160. <https://doi.org/10.1093/neucas/7.2.145>
- Posimo, J. M., Titler, A. M., Choi, H. J. H., Unnithan, A. S., & Leak, R. K. (2013). Neocortex and Allocortex Respond Differentially to Cellular Stress In Vitro and Aging In Vivo. *PLoS ONE*, 8(3), 1–19. <https://doi.org/10.1371/journal.pone.0058596>
- Raj, A., Kuceyeski, A., & Weiner, M. (2012). A Network Diffusion Model of Disease Progression in Dementia. *Neuron*, 73(6), 1204–1215. <https://doi.org/10.1016/j>
- Rankin, K. P., Gorno-Tempini, M. L., Allison, S. C., Stanley, C. M., Glenn, S., Weiner, M. W., & Miller, B. L. (2006). Structural anatomy of empathy in neurodegenerative disease. *Brain*, 129(11), 2945–2956. <https://doi.org/10.1093/brain/awl254>
- Rascovsky, K., Hodges, J. R., Knopman, D., Mendez, M. F., Kramer, J. H., Neuhaus, J., ... Miller, B. L. (2011). Sensitivity of revised diagnostic criteria for the behavioural variant of frontotemporal dementia. *Brain : A Journal of Neurology*, 134(Pt 9), 2456–2477. <https://doi.org/10.1093/brain/awr179>
- Rogalski, E., Mardersteck, A., Wieneke, C., Weintraub, S., Mesulam, M.-M., Cobia, D., & Rademaker, A. (2014). Asymmetry of cortical decline in subtypes of primary progressive aphasia. *Neurology*, 83(13), 1184–1191. <https://doi.org/10.1212/WNL.0000000000000824>
- Rohrer, J. D., Gennatas, E. D., & Trojanowski, J. Q. (2010). TDP-43 subtypes are associated with distinct atrophy patterns in frontotemporal dementia. *Neurology*, 75(24), 2204–2211.
- Rohrer, J. D., Mcnaught, E., Foster, J., Barnes, J., Omar, R., & Warrington, E. K. (2008). Tracking progression in frontotemporal lobar degeneration Serial MRI in semantic dementia, 1445–1452.
- Rosen, H. J. (2002). Emotion comprehension in the temporal variant of frontotemporal dementia. *Brain*, 125(10), 2286–2295. <https://doi.org/10.1093/brain/awf225>
- Rosen, Howard J., Wilson, M. R., Schauer, G. F., Allison, S., Gorno-Tempini, M. L., Pace-Savitsky, C., ... Miller, B. L. (2006). Neuroanatomical correlates of impaired recognition of emotion in dementia. *Neuropsychologia*, 44(3), 365–373. <https://doi.org/10.1016/j.neuropsychologia.2005.06.012>
- Sampathu, D. M., Neumann, M., Kwong, L. K., Chou, T. T., Micsenyi, M., Truax, A., ... Lee, V. M. Y. (2006). Pathological heterogeneity of frontotemporal lobar degeneration with ubiquitin-positive inclusions delineated by ubiquitin immunohistochemistry and novel monoclonal antibodies. *American Journal of Pathology*, 169(4), 1343–1352. <https://doi.org/10.2353/ajpath.2006.060438>

- Seeley, W. W., Bauer, A. M., Miller, B. L., Gorno-Tempini, M. L., Kramer, J. H., Weiner, M., & Rosen, H. J. (2005). The natural history of temporal variant frontotemporal dementia. *Neurology*, *64*(8), 1384–1390. <https://doi.org/10.1021/nl061786n>.Core-Shell
- Seeley, W. W., Crawford, R., Zhou, J., Miller, B. L., & Greicius, M. (2009). Neurodegenerative diseases target large-scale human brain networks. *Neuron*, *62*(1), 42–52. <https://doi.org/10.1016/j.neuron.2009.03.024>.Neurodegenerative
- Shdo, S. M., Ranasinghe, K. G., Gola, K. A., Mielke, C. J., Paul, V., Miller, B. L., & Rankin, K. P. (2018). Deconstructing empathy: Neuroanatomical dissociations between affect sharing and prosocial motivation using a patient lesion model, *116*, 126–135. <https://doi.org/10.1016/j.neuropsychologia.2017.02.010>.Shdo
- Snowden, J. S., Thompson, J. C., & Neary, D. (2012). Famous people knowledge and the right and left temporal lobes. *Behavioural Neurology*, *25*(1), 35–44. <https://doi.org/10.3233/BEN-2012-0347>
- Snowden, J. S., Thompson, J. C., Stopford, C. L., Richardson, A. M. T., Gerhard, A., Neary, D., & Mann, D. M. A. (2011). The clinical diagnosis of early-onset dementias : diagnostic accuracy and clinicopathological relationships, 2478–2492. <https://doi.org/10.1093/brain/awr189>
- Snowden, J, Thompson, J., & Neary, D. (2004). Knowledge of famous faces and names in semantic dementia. *Brain*, *127*(4), 860–872. <https://doi.org/10.1093/brain/awh099>
- Snowden, Julie, Goulding, P., & Neary, D. (1989). Semantic dementia: A form of circumscribed cerebral atrophy. *Behavioural Neurology*, *2*(3), 167–182. [https://doi.org/MCI-Converted #101; Thesis\\_references-Converted #324](https://doi.org/MCI-Converted #101; Thesis_references-Converted #324)
- Snowden, Julie, Harris, J., Thompson, J., Kobylecki, C., Jones, M., Richardson, A., & Neary, D. (2017). Semantic dementia and the left and right temporal lobes. *Cortex*, (September), 1–16. <https://doi.org/10.1016/j.cortex.2017.08.024>
- Soto, C., & Pritzkow, S. (2018). Protein misfolding, aggregation, and conformational strains in neurodegenerative diseases. *Nature Neuroscience*, *21*(10), 1332–1340. <https://doi.org/10.1038/s41593-018-0235-9>
- Spinelli, E. G., Mandelli, M. L., Miller, Z. A., Santos-Santos, M. A., Wilson, S. M., Agosta, F., ... Gorno-Tempini, M. L. (2017). Typical and atypical pathology in primary progressive aphasia variants. *Annals of Neurology*, 2–45. <https://doi.org/10.1002/ana.24885>
- Sreedharan, J., Blair, I. P., Tripathi, V. B., Hu, X., Vance, C., Rogelj, B., ... Shaw, C. E. (2008). TDP-43 Mutations in Familial and Sporadic Amyotrophic Lateral Sclerosis, *249*(March).
- Steinacker, P., Barschke, P., & Otto, M. (2018). Biomarkers for diseases with TDP-43 pathology. *Molecular and*

*Cellular Neuroscience*, #pagerange#. <https://doi.org/10.1016/j.mcn.2018.10.003>

- Thompson, S. A., Patterson, K., & Hodges, J. R. (2003). Left/right asymmetry of atrophy in semantic dementia: Behavioral-cognitive implications. *Neurology*, *61*(9), 1196–1203. <https://doi.org/10.1212/01.WNL.0000091868.28557.B8>
- Tollervey, J. R., Curk, T., Rogelj, B., Briese, M., Cereda, M., Kayikci, M., ... Ule, J. (2011). Characterizing the RNA targets and position-dependent splicing regulation by TDP-43. *Nature Neuroscience*, *14*(4), 452–458. <https://doi.org/10.1038/nn.2778>
- Tsapkini, K., Frangakis, C. E., & Hillis, A. E. (2011). The function of the left anterior temporal pole: Evidence from acute stroke and infarct volume. *Brain*, *134*(10), 3094–3105. <https://doi.org/10.1093/brain/awr050>
- Visser, M., Jefferies, E., & Lambon Ralph, M. A. (2010). Semantic Processing in the Anterior Temporal Lobes: A Meta-analysis of the Functional Neuroimaging Literature. *Journal of Cognitive Neuroscience*, *22*(6), 1083–1094. <https://doi.org/10.1162/jocn.2009.21309>
- Vonk, J., Borghesani, V., Battistella, G., Younes, K., DeLeon, J., Welch, A., ... Gorno-Tempini, M. L. (2019). A case of bilateral anterior temporal degeneration with sparing of word comprehension. *Aphasiology*.
- Walsh, D. M., & Selkoe, D. J. (2016). A critical appraisal of the pathogenic protein spread hypothesis of neurodegeneration. *Nature Reviews Neuroscience*, *17*(4), 251–260. <https://doi.org/10.1038/nrn.2016.13>
- Watson, C. L., Possin, K., Allen, I. E., Hubbard, H. I., Meyer, M., Welch, A. E., ... Gorno-Tempini, M. L. (2018). Visuospatial Functioning in the Primary Progressive Aphasias. *Journal of the International Neuropsychological Society*, *24*(3), 259–268. <https://doi.org/10.1017/S1355617717000984>
- Whitwell, J. L., Senjem, M. L., Jack, C. R., Knopman, D. S., Petersen, R. C., Rademakers, R., ... Dickson, D. W. (2010). Does TDP-43 type confer a distinct pattern of atrophy in frontotemporal lobar degeneration? *Neurology*, *75*(24), 2212–2220. <https://doi.org/10.1212/wnl.0b013e31820203c2>
- Woollams, A. M., & Patterson, K. (2017). Cognitive consequences of the left-right asymmetry of atrophy in semantic dementia. *Cortex*, (December), 1–13. <https://doi.org/10.1016/j.cortex.2017.11.014>
- Zeighami, Y., Ulla, M., Iturria-Medina, Y., Dadar, M., Zhang, Y., Larcher, K. M.-H., ... Dagher, A. (2015). Network structure of brain atrophy in de novo Parkinson's disease. *ELife*, *4*, 1–20. <https://doi.org/10.7554/elife.08440>
- Zheng, Y.-Q., Zhang, Y., Yau, Y. H. C., Zeighami, Y., Larcher, K., Misic, B., & Dagher, A. (2018). Connectome architecture, gene expression and functional co-activation shape the propagation of misfolded proteins in neurodegenerative disease. *BioRxiv*, 449199. <https://doi.org/10.1101/449199>
